# Supplementary material
Source: PubMed Central journal article supplement (PMC8489356)
Supplement: NIHMS1731151-supplement-Supplementary_Tables_S1-S3_and_S6.pdf [file NIHMS1731151-supplement-Supplementary_Tables_S1-S3_and_S6.pdf]

**Table S1. Sample Demographic data for human biosamples used in manuscript.** Related to Figure S1 and STAR Methods section “Human biofluid sample collection”.

|                                        | Non-GRN<br>Clinically Normal<br>(N=20) | Non-GRN FTD<br>(N=26) | GRN+ Clinically<br>Normal<br>(N=2) | GRN+ FTD<br>(N=16) |
|----------------------------------------|----------------------------------------|-----------------------|------------------------------------|--------------------|
| <b>Source</b>                          |                                        |                       |                                    |                    |
| NCRAD                                  | 20 (100%)                              | 6 (23.1%)             | 0 (0%)                             | 9 (56.2%)          |
| UCSF                                   | 0 (0%)                                 | 20 (76.9%)            | 2 (100%)                           | 7 (43.8%)          |
| <b>AGE_AT_ONSET</b>                    |                                        |                       |                                    |                    |
| 45-49                                  | 0 (0%)                                 | 1 (3.8%)              | 0 (0%)                             | 1 (6.2%)           |
| 55-59                                  | 0 (0%)                                 | 4 (15.4%)             | 0 (0%)                             | 0 (0%)             |
| 70-74                                  | 0 (0%)                                 | 1 (3.8%)              | 0 (0%)                             | 0 (0%)             |
| 50-54                                  | 0 (0%)                                 | 0 (0%)                | 0 (0%)                             | 1 (6.2%)           |
| 60-64                                  | 0 (0%)                                 | 0 (0%)                | 0 (0%)                             | 5 (31.2%)          |
| 65-69                                  | 0 (0%)                                 | 0 (0%)                | 0 (0%)                             | 2 (12.5%)          |
| Missing                                | 20 (100%)                              | 20 (76.9%)            | 2 (100%)                           | 7 (43.8%)          |
| <b>AGE_AT_VISIT</b>                    |                                        |                       |                                    |                    |
| 45-49                                  | 1 (5.0%)                               | 0 (0%)                | 0 (0%)                             | 1 (6.2%)           |
| 50-54                                  | 5 (25.0%)                              | 0 (0%)                | 0 (0%)                             | 0 (0%)             |
| 55-59                                  | 6 (30.0%)                              | 3 (11.5%)             | 0 (0%)                             | 1 (6.2%)           |
| 60-64                                  | 6 (30.0%)                              | 2 (7.7%)              | 0 (0%)                             | 2 (12.5%)          |
| 65-69                                  | 2 (10.0%)                              | 0 (0%)                | 0 (0%)                             | 4 (25.0%)          |
| 75-79                                  | 0 (0%)                                 | 1 (3.8%)              | 0 (0%)                             | 0 (0%)             |
| 70-74                                  | 0 (0%)                                 | 0 (0%)                | 0 (0%)                             | 1 (6.2%)           |
| Missing                                | 0 (0%)                                 | 20 (76.9%)            | 2 (100%)                           | 7 (43.8%)          |
| <b>RACE</b>                            |                                        |                       |                                    |                    |
| White                                  | 20 (100%)                              | 25 (96.2%)            | 2 (100%)                           | 14 (87.5%)         |
| Native Hawaiian<br>or Pacific Islander | 0 (0%)                                 | 1 (3.8%)              | 0 (0%)                             | 0 (0%)             |
| Black or African<br>American           | 0 (0%)                                 | 0 (0%)                | 0 (0%)                             | 1 (6.2%)           |
| Multiracial                            | 0 (0%)                                 | 0 (0%)                | 0 (0%)                             | 1 (6.2%)           |
| <b>DIAGNOSIS</b>                       |                                        |                       |                                    |                    |
| Clinically Normal                      | 20 (100%)                              | 0 (0%)                | 2 (100%)                           | 0 (0%)             |
| FTD                                    | 0 (0%)                                 | 26 (100%)             | 0 (0%)                             | 16 (100%)          |
| <b>PHENOTYPE</b>                       |                                        |                       |                                    |                    |
| Clinically Normal                      | 20 (100%)                              | 0 (0%)                | 2 (100%)                           | 0 (0%)             |
| FTD                                    | 0 (0%)                                 | 24 (92.3%)            | 0 (0%)                             | 7 (43.8%)          |
| AD                                     | 0 (0%)                                 | 1 (3.8%)              | 0 (0%)                             | 3 (18.8%)          |
| MCI                                    | 0 (0%)                                 | 0 (0%)                | 0 (0%)                             | 5 (31.2%)          |
| Corticobasal<br>syndrome               | 0 (0%)                                 | 1 (3.8%)              | 0 (0%)                             | 1 (6.2%)           |
| <b>FAMILY_GENE</b>                     |                                        |                       |                                    |                    |
| NONE                                   | 20 (100%)                              | 25 (96.2%)            | 0 (0%)                             | 0 (0%)             |
| MAPT                                   | 0 (0%)                                 | 1 (3.8%)              | 0 (0%)                             | 0 (0%)             |
| GRN                                    | 0 (0%)                                 | 0 (0%)                | 2 (100%)                           | 16 (100%)          |

**Table S2. PTV:PGRN variant sequences.** Related to STAR Methods section “Engineering PTV variants with improved stability”.

| Variant           | Peptide sequence | [M+2H] <sup>2+</sup> | RT (min) | AUC    | %    |
|-------------------|------------------|----------------------|----------|--------|------|
| QLL (wt, Expi293) | DPALRQLL         | 463.277              | 22.4     | 4.55e8 | 94.6 |
|                   | DPALRQL          | 406.735              | 16.3     | 7.12e6 | 1.5  |
|                   | DPALRQ           | 350.193              | 10.4     | 1.65e7 | 3.4  |
|                   | DPALR            | 286.164              | 9.05     | 2.20e6 | 0.5  |
| PIL (CHO-K1)      | DPALRPIL         | 447.775              | 22.63    | 3.84e9 | 90.9 |
|                   | DPALRPI          | 391.233              | 17.56    | 3.63e8 | 8.6  |
|                   | DPALRP           | 334.691              | 13.02    | 1.76e7 | 0.4  |
|                   | DPALR            | 286.164              | 9.05     | 3.46e6 | 0.1  |

**Table S3. Stability of PTV:PGRN variants with the three C-terminal amino acids of PGRN (QLL) replaced with the corresponding amino acids from orthologous proteins. Related to STAR Methods section “Engineering PTV variants with improved stability”.**

| <b>C-terminal PGRN sequence</b> | <b>Sequence database</b> | <b>Identifier</b> | <b>Expression cell line</b> | <b>% intact C-terminus</b> |
|---------------------------------|--------------------------|-------------------|-----------------------------|----------------------------|
| QLL (Homo sapiens)              | NCBI                     | NM_002087         | Expi293                     | 95%                        |
| QLL (Homo sapiens)              | NCBI                     | NM_002087         | CHO-K1                      | 7%                         |
| PIL (Latimeria chalumnae)       | UniProtKB/<br>TrEMBL     | H3AMW7            | CHO-K1                      | 91%                        |
| PFL (Xenopus tropicalis)        | NCBI                     | NM_001078701      | CHO-K1                      | 87%                        |
| QQL (Pteropus vampyrus)         | NCBI                     | XM_023521549      | CHO-K1                      | 59%                        |
| VVL (Electrophorus electricus)  | NCBI                     | XP_035379781      | CHO-K1                      | 39%                        |
| VTL (Oreochromis niloticus)     | UniProtKB/<br>TrEMBL     | I3JXP4            | CHO-K1                      | 29%                        |
| LLL (Chinchilla lanigera)       | NCBI                     | XM_005394531      | CHO-K1                      | <1%                        |
| PLL (Mus musculus)              | NCBI                     | NM_008175         | CHO-K1                      | <1%                        |
| PRL (Cavia porcellus)           | NCBI                     | XM_013148159      | CHO-K1                      | <1%                        |

**Table S6: LC-MS acquisition parameters for the GlcCer/GalCer/GlcSph/GalSph assay.**

Related to STAR Methods section “Analysis of GlcCer, GalCer, GlcSph, and GalSph”.

| <b>Lipid</b>            | <b>Internal Standard</b> | <b>Q1<br/>(m/z)</b> | <b>Q3<br/>(m/z)</b> | <b>DP<br/>(V)</b> | <b>CE<br/>(V)</b> |
|-------------------------|--------------------------|---------------------|---------------------|-------------------|-------------------|
| GlcCer(d18:1/16:0)      | GlcCer(d18:1/16:0(d3))   | 700.6               | 264.3               | 45                | 45                |
| GlcCer(d18:1/18:0)      | GlcCer(d18:1(d5)/18:0)   | 728.6               | 264.3               | 45                | 45                |
| GlcCer(d18:2/18:0)      | GlcCer(d18:1(d5)/18:0)   | 726.6               | 262.3               | 45                | 45                |
| GlcCer(d18:1/20:0)      | GlcCer(d18:1(d5)/18:0)   | 756.6               | 264.3               | 45                | 45                |
| GlcCer(d18:2/20:0)      | GlcCer(d18:1(d5)/18:0)   | 754.6               | 262.3               | 45                | 45                |
| GlcCer(d18:1/22:0)      | GlcCer(d18:1(d5)/18:0)   | 784.7               | 264.3               | 45                | 45                |
| GlcCer(d18:1/22:1)      | GlcCer(d18:1(d5)/18:0)   | 782.7               | 264.3               | 45                | 45                |
| GlcCer(d18:2/22:0)      | GlcCer(d18:1(d5)/18:0)   | 782.7               | 262.3               | 45                | 45                |
| GlcCer(d18:1/24:1)      | GlcCer(d18:1(d5)/18:0)   | 810.7               | 264.3               | 45                | 45                |
| GlcCer(d18:1/24:0)      | GlcCer(d18:1(d5)/18:0)   | 812.7               | 264.3               | 45                | 45                |
| Glucosylsphingosine     | Glucosylsphingosine(d5)  | 462.2               | 282.3               | 45                | 26                |
| GlcCer(d18:1(d5)/18:0)  | Internal Standard        | 733.6               | 269.3               | 45                | 45                |
| GlcCer(d18:1/16:0(d3))  | Internal Standard        | 703.6               | 264.3               | 45                | 45                |
| GalCer(d18:1/15:0)      | Internal Standard        | 686.3               | 264.3               | 45                | 45                |
| Glucosylsphingosine(d5) | Internal Standard        | 467.2               | 287.3               | 30                | 26                |
| GalCer(d18:1/16:0)      | GalCer(d18:1/15:0)       | 700.6               | 264.3               | 45                | 45                |
| GalCer(d18:1/18:0)      | GalCer(d18:1/15:0)       | 728.6               | 264.3               | 45                | 45                |
| GalCer(d18:2/18:0)      | GalCer(d18:1/15:0)       | 726.6               | 262.3               | 45                | 45                |
| GalCer(d18:1/20:0)      | GalCer(d18:1/15:0)       | 756.6               | 264.3               | 45                | 45                |
| GalCer(d18:2/20:0)      | GalCer(d18:1/15:0)       | 754.6               | 262.3               | 45                | 45                |
| GalCer(d18:1/22:0)      | GalCer(d18:1/15:0)       | 784.7               | 264.3               | 45                | 45                |
| GalCer(d18:1/22:1)      | GalCer(d18:1/15:0)       | 782.7               | 264.3               | 45                | 45                |

|                          |                         |       |       |    |    |
|--------------------------|-------------------------|-------|-------|----|----|
| GalCer(d18:2/22:0)       | GalCer(d18:1/15:0)      | 782.7 | 262.3 | 45 | 45 |
| GalCer(d18:1/24:1)       | GalCer(d18:1/15:0)      | 810.7 | 264.3 | 45 | 45 |
| GalCer(d18:1/24:0)       | GalCer(d18:1/15:0)      | 812.7 | 264.3 | 45 | 45 |
| Galactosylsphingosine    | Glucosylsphingosine(d5) | 462.2 | 282.3 | 45 | 16 |
| alpha-GalCer(d18:1/16:0) | GalCer(d18:1/15:0)      | 700.6 | 264.3 | 45 | 45 |
| alpha-GalCer(d18:1/18:0) | GalCer(d18:1/15:0)      | 728.6 | 264.3 | 45 | 45 |
| alpha-GalCer(d18:2/18:0) | GalCer(d18:1/15:0)      | 726.6 | 262.3 | 45 | 45 |
| alpha-GalCer(d18:1/20:0) | GalCer(d18:1/15:0)      | 756.6 | 264.3 | 45 | 45 |
| alpha-GalCer(d18:2/20:0) | GalCer(d18:1/15:0)      | 754.6 | 262.3 | 45 | 45 |
| alpha-GalCer(d18:1/22:0) | GalCer(d18:1/15:0)      | 784.7 | 264.3 | 45 | 45 |
| alpha-GalCer(d18:1/22:1) | GalCer(d18:1/15:0)      | 782.7 | 264.3 | 45 | 45 |
| alpha-GalCer(d18:2/22:0) | GalCer(d18:1/15:0)      | 782.7 | 262.3 | 45 | 45 |
| alpha-GalCer(d18:1/24:1) | GalCer(d18:1/15:0)      | 810.7 | 264.3 | 45 | 45 |
| alpha-GalCer(d18:1/24:0) | GalCer(d18:1/15:0)      | 812.7 | 264.3 | 45 | 45 |
| Cholesteryl glucoside    | GlcCer(d18:1(d5)/18:0)  | 566.6 | 369.3 | 80 | 17 |
| Cholesteryl galactoside  | GlcCer(d18:1(d5)/18:0)  | 566.6 | 369.3 | 80 | 17 |
| Sitosteryl glucoside     | GlcCer(d18:1(d5)/18:0)  | 594.6 | 397.4 | 80 | 17 |
| Sitosteryl galactoside   | GlcCer(d18:1(d5)/18:0)  | 594.6 | 397.4 | 80 | 17 |
